# Supplementary material for: Exogenous Gibberellic Acid or Dilute Bee Honey Boosts Drought Stress Tolerance in Vicia faba by Rebalancing Osmoprotectants, Antioxidants, Nutrients, and Phytohormones
Source: PubMed Central journal article supplement (PMC8068922; doi:10.3390/plants10040748), 2021-04-11
Supplement: plants-10-00748-s001.pdf [file plants-10-00748-s001.pdf]

**Table S1.** A preliminary pot study conducted to identify the optimal concentration of diluted bee-honey (Db-H) and gibberellic acid (GA<sub>3</sub>), as well as identifying the drought threshold of faba bean (Giza 40 cultivar) for the main study.

| Treatments                    | No. of Leaves Plant <sup>-1</sup> | Leaf Area Plant <sup>-1</sup> (cm <sup>2</sup> ) | Shoot DW Plant <sup>-1</sup> (g) | No. of Green Pods Plant <sup>-1</sup> | Total Chlorophylls (mg g <sup>-1</sup> FW) |
|-------------------------------|-----------------------------------|--------------------------------------------------|----------------------------------|---------------------------------------|--------------------------------------------|
| Control                       | 18.8±2.0c                         | 76.1±8.3c                                        | 8.2±0.7c                         | 9.7±1.1c                              | 2.22±0.05c                                 |
| 10 g Db-H/L                   | 21.1±2.2b                         | 89.5±8.9b                                        | 10.1±1.2b                        | 12.1±1.5b                             | 2.48±0.07b                                 |
| <b>20 g Db-H/L</b>            | <b>25.4±2.8a</b>                  | <b>107.5±11.1a</b>                               | <b>13.4±1.9a</b>                 | <b>16.2±1.8a</b>                      | <b>2.79±0.11a</b>                          |
| 30 g Db-H/L                   | 24.9±2.5a                         | 108.4±10.9a                                      | 13.4±1.8a                        | 16.3±1.7a                             | 2.82±0.11a                                 |
| Control                       | 18.8±2.0c                         | 76.1±8.3c                                        | 8.2±0.7c                         | 9.7±1.1c                              | 2.22±0.05c                                 |
| 10 mg GA <sub>3</sub> /L      | 20.8±2.1b                         | 84.7±9.5b                                        | 10.0±0.9b                        | 11.3±1.3b                             | 2.42±0.05b                                 |
| <b>20 mg GA<sub>3</sub>/L</b> | <b>23.4±2.4a</b>                  | <b>101.6±10.9a</b>                               | <b>12.4±1.4a</b>                 | <b>14.6±1.5a</b>                      | <b>2.69±0.09a</b>                          |
| 30 mg GA <sub>3</sub> /L      | 23.6±2.5a                         | 104.5±11.1a                                      | 12.6±1.6a                        | 14.8±1.6a                             | 2.68±0.09a                                 |
| 100% of ETc                   | 18.8±2.0a                         | 76.1±8.3a                                        | 8.2±0.7a                         | 9.7±1.1a                              | 2.22±0.05a                                 |
| 80% of ETc                    | 14.4±1.5b                         | 52.4±6.0b                                        | 6.9±0.5b                         | 7.1±0.8b                              | 1.56±0.04b                                 |
| <b>60% of ETc</b>             | <b>4.9±0.4c</b>                   | <b>12.8±1.3c</b>                                 | <b>2.6±0.2c</b>                  | <b>2.3±0.3c</b>                       | <b>0.69±0.02c</b>                          |
| 40% of ETc                    | Plants died                       |                                                  |                                  |                                       |                                            |

The same letters with mean values±SE in each column indicate non-significant differences, and different letters indicate significant differences according to LSD test ( $P \leq 0.05$ ).

It is evident from this Table (S1) that the best concentration of diluted bee-honey (Db-H at 20g per liter) and gibberellic acid (GA<sub>3</sub> at 20 mg per liter) was chosen, which gave the best results from an economic point of view. As for the deficit irrigation water treatments, the deficit irrigation treatment at 60% of ETc was chosen prior to the treatment in which the plants died.
